# Supplementary material for: First-Trimester Screening for Fetal Growth Restriction and Small-for-Gestational-Age Pregnancies without Preeclampsia Using Cardiovascular Disease-Associated MicroRNA Biomarkers
Source: MDPI journal article supplement (doi:10.3390/biomedicines10030718), 2022-03-19
Supplement: s1 [file s1]

A

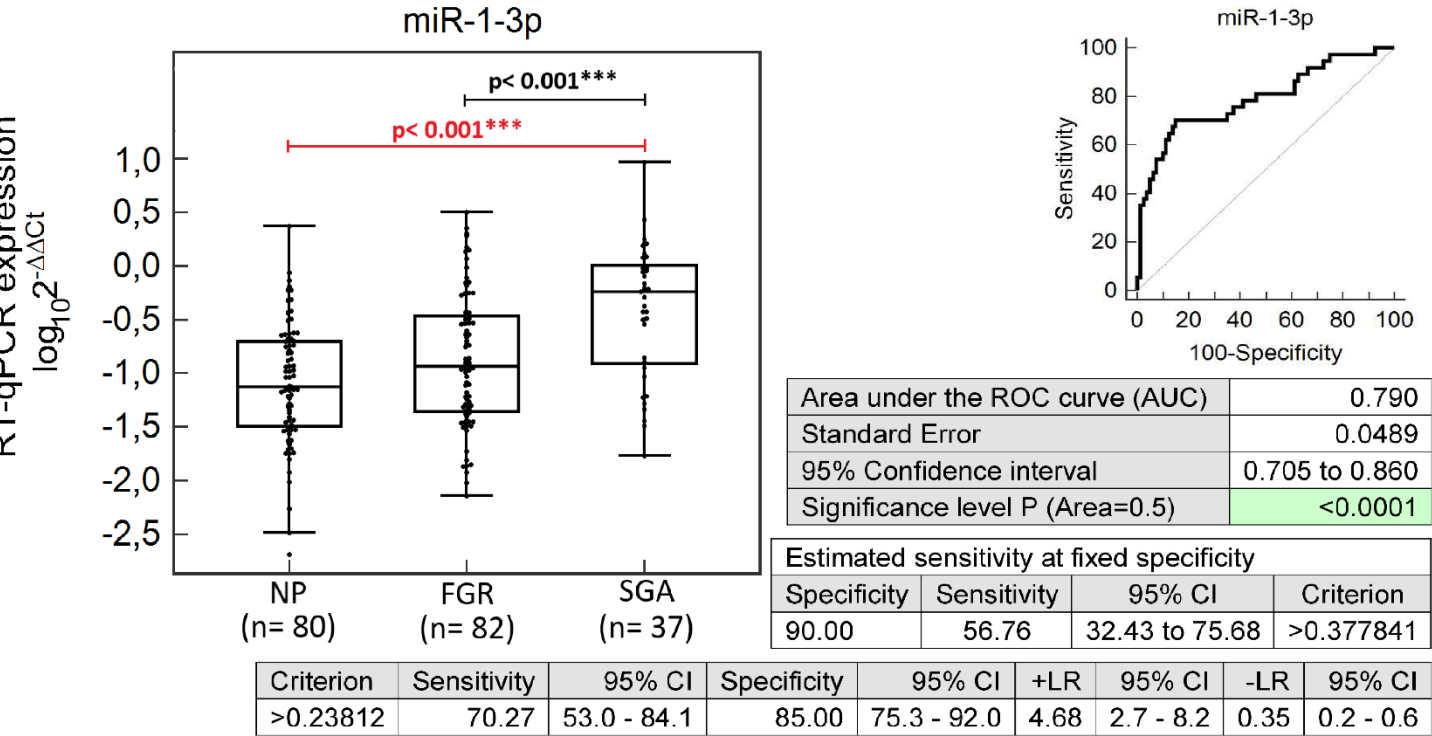

B

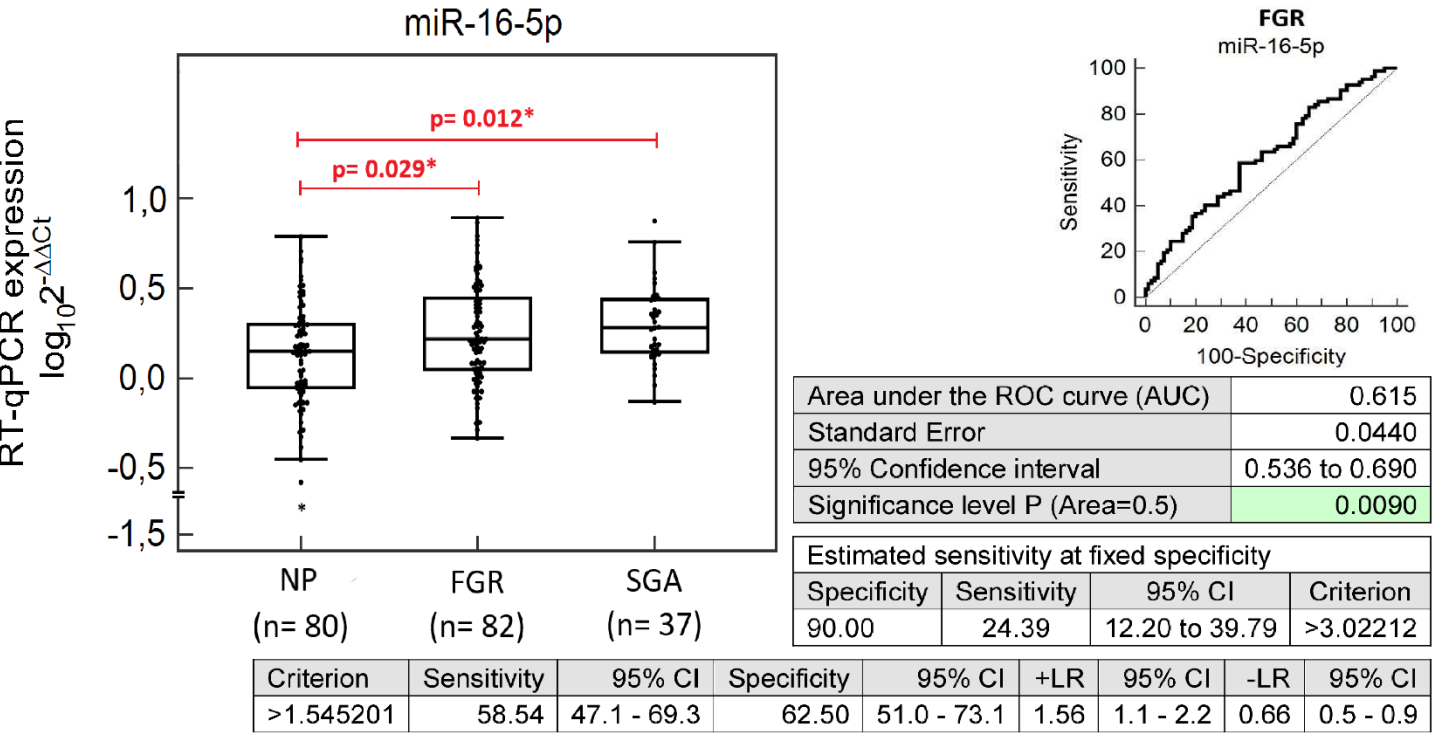

C

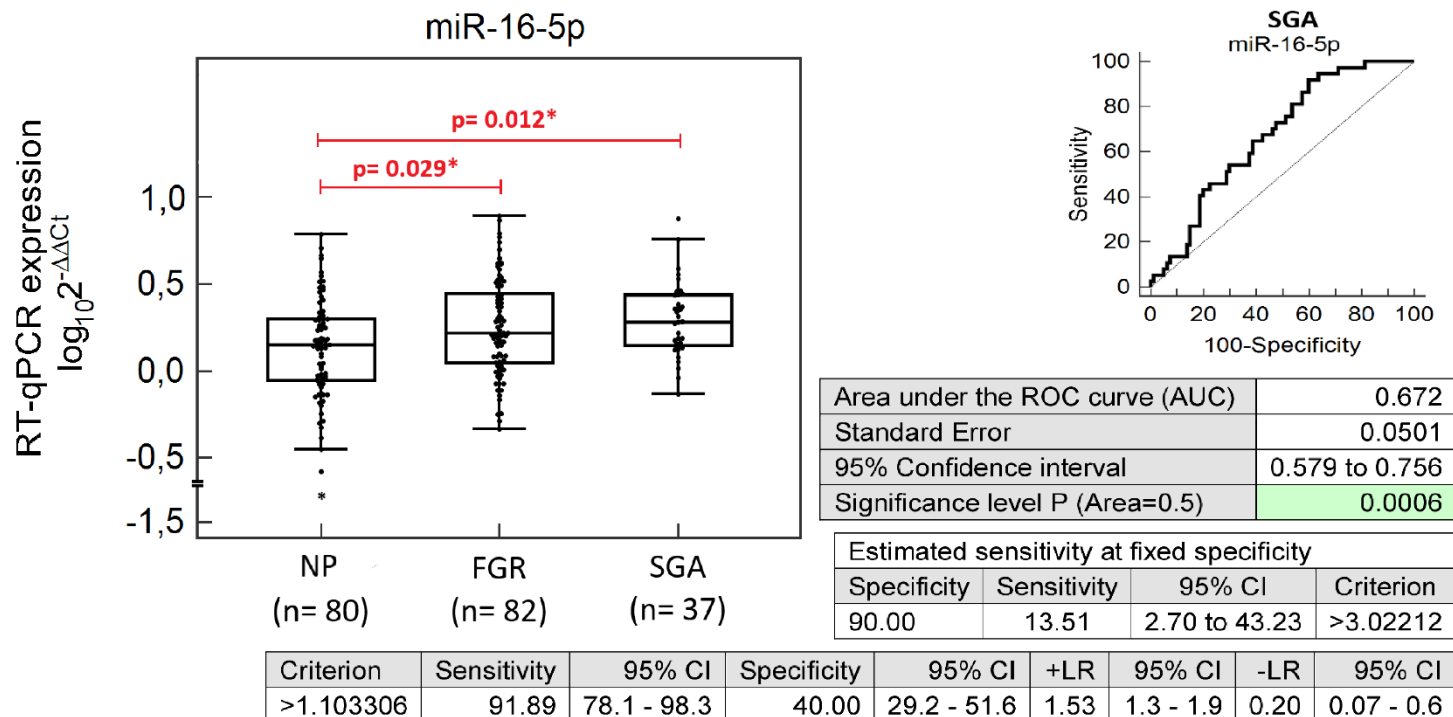

D

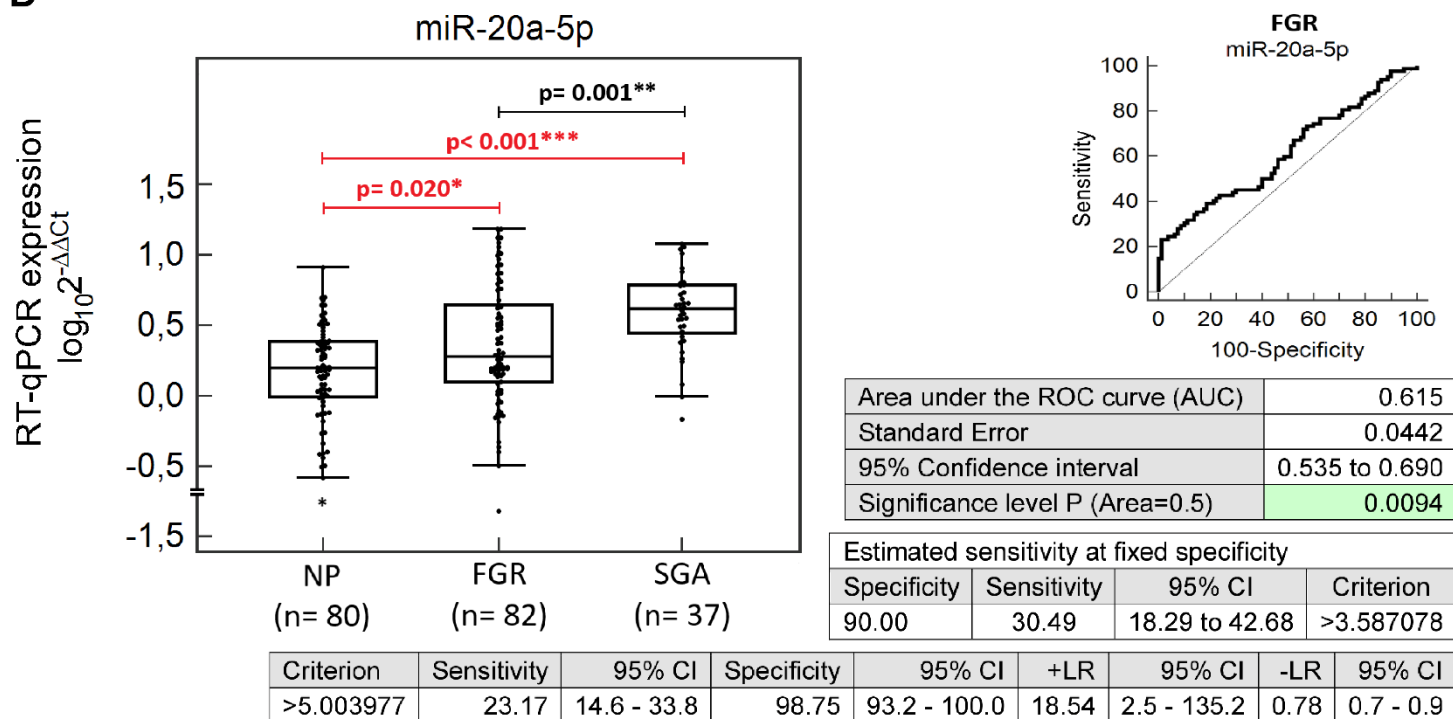

G

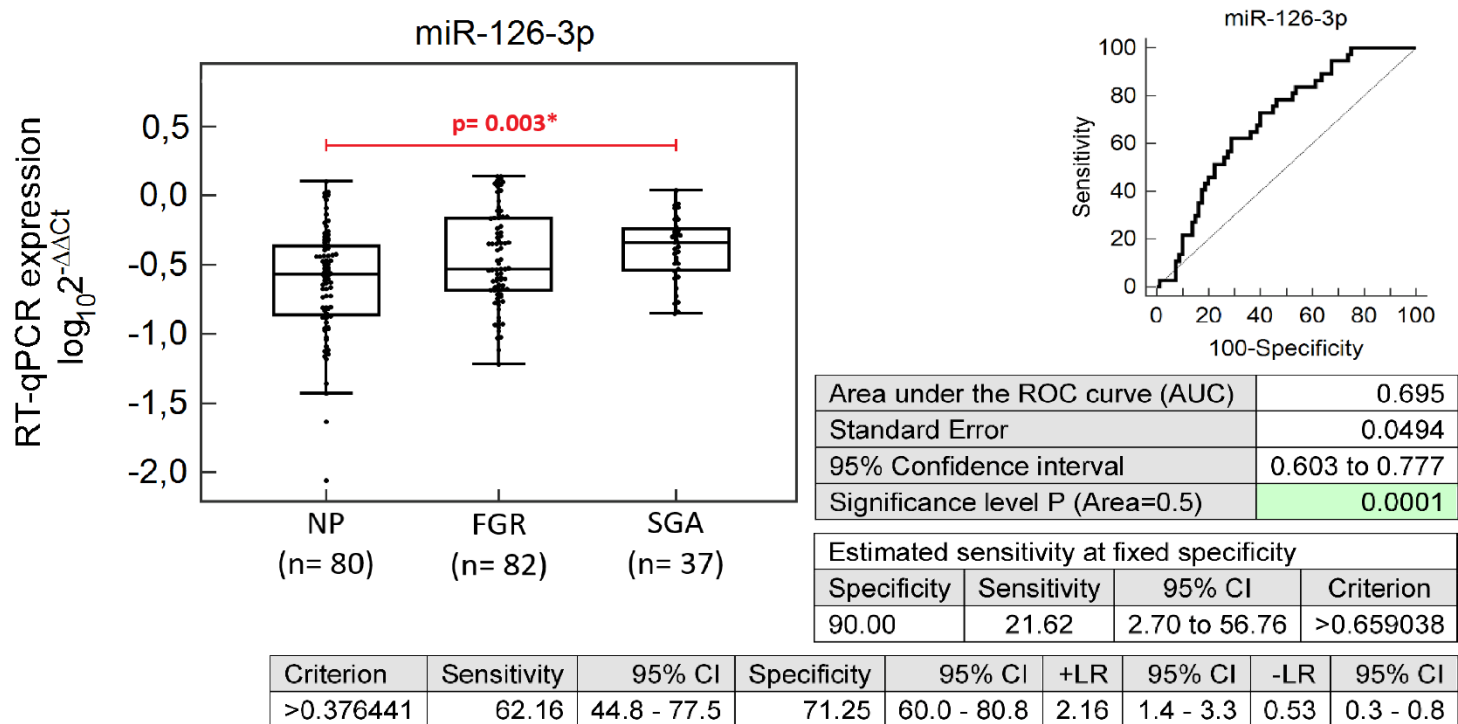

H

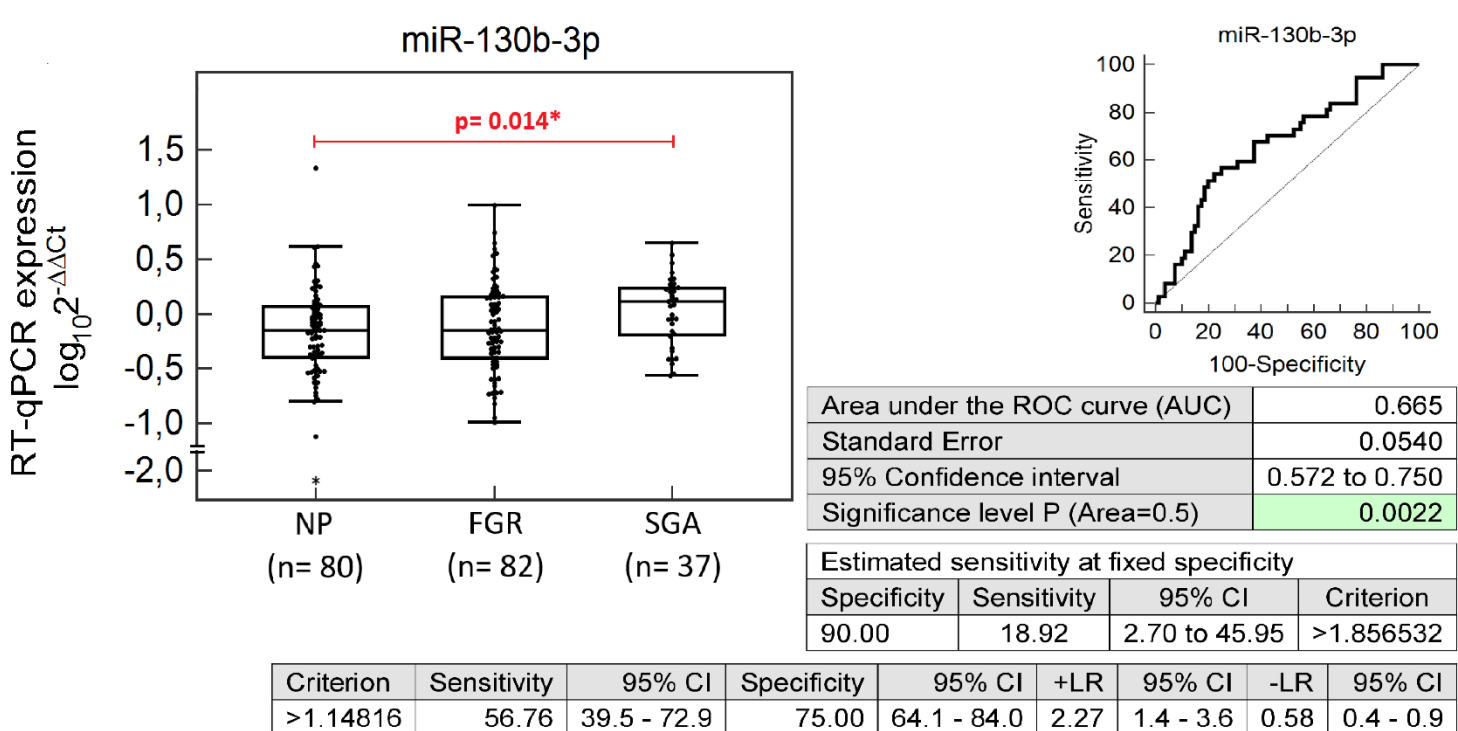

I

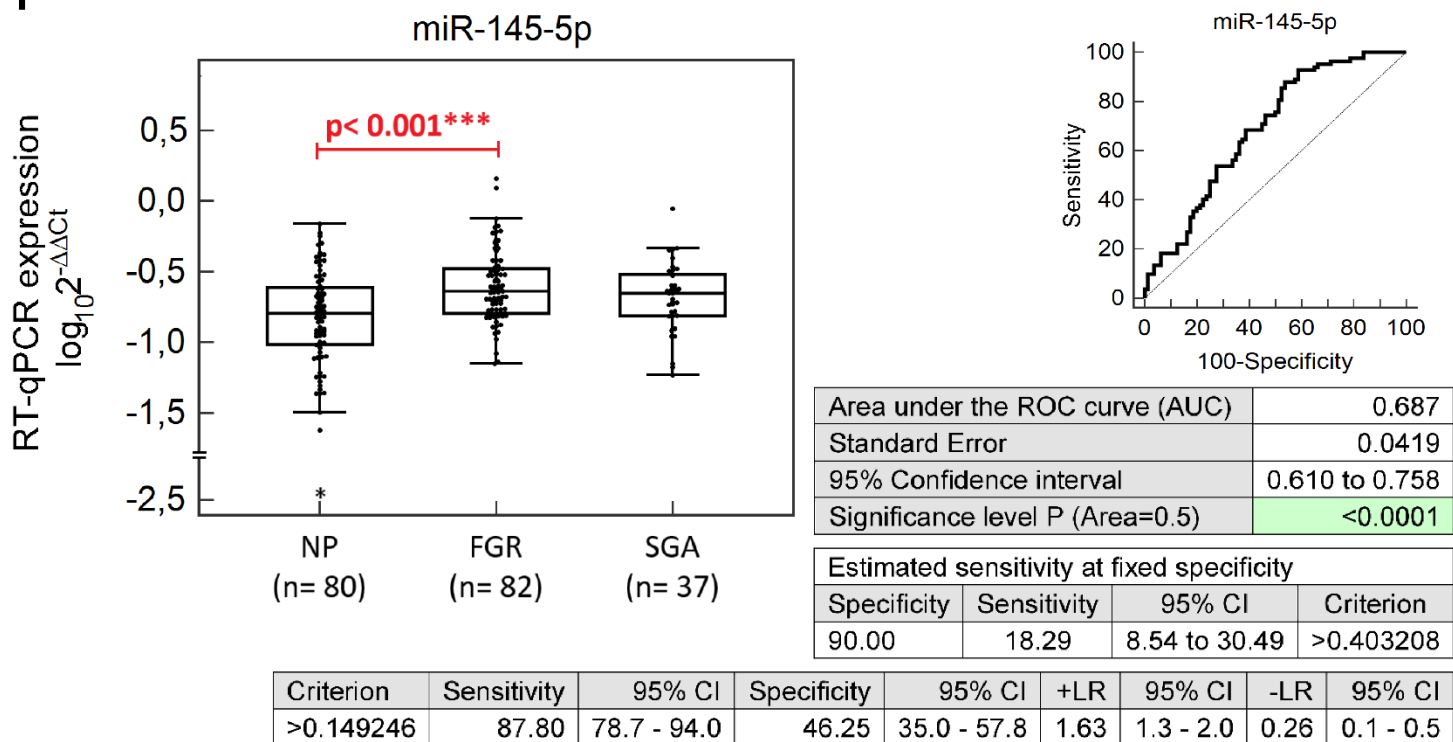

J

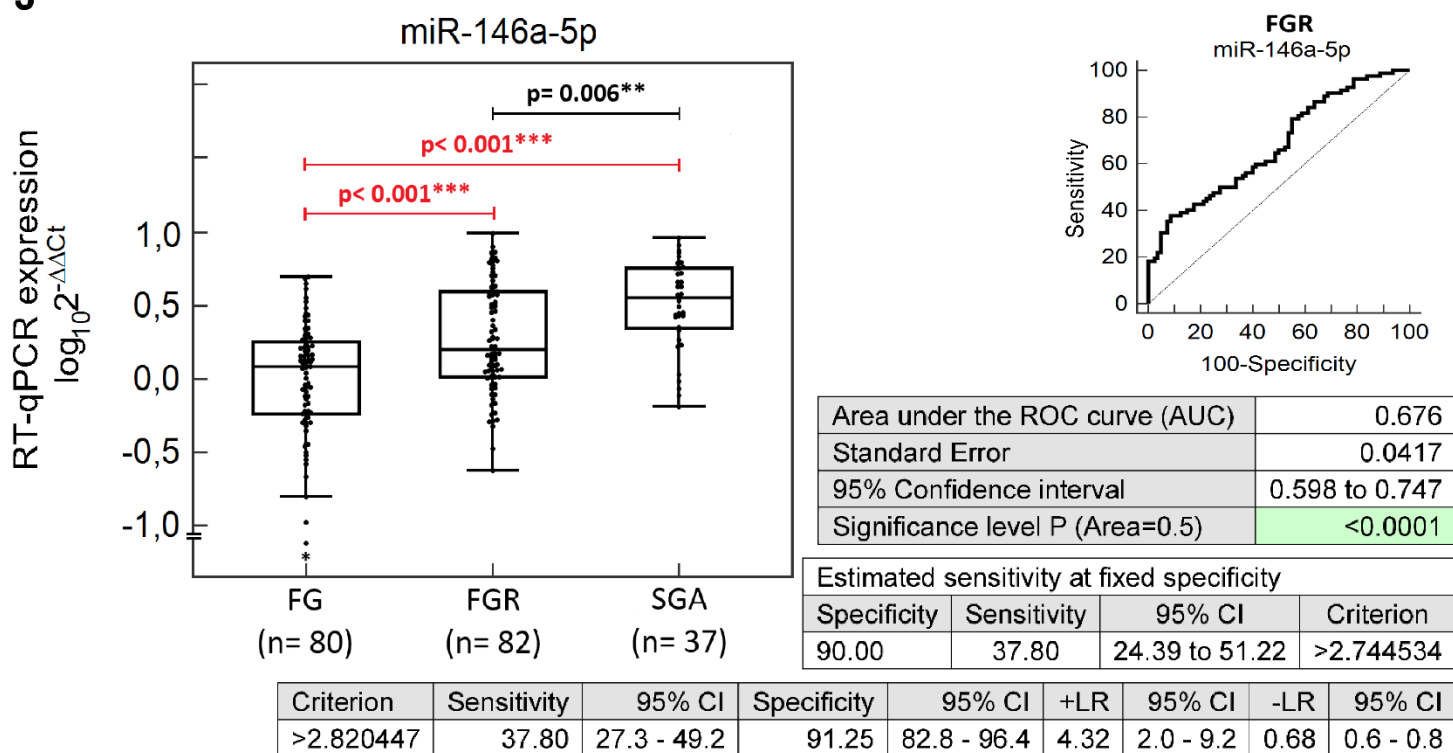

M

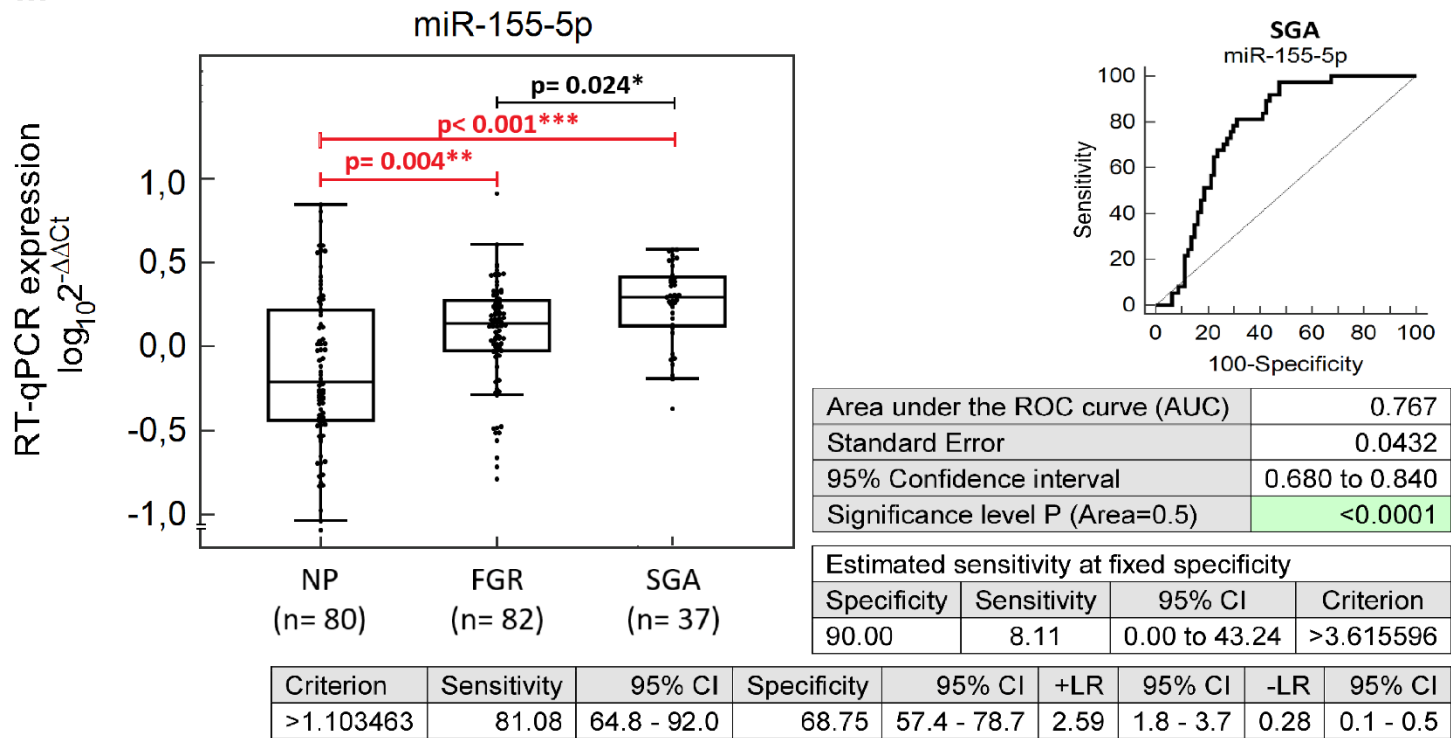

N

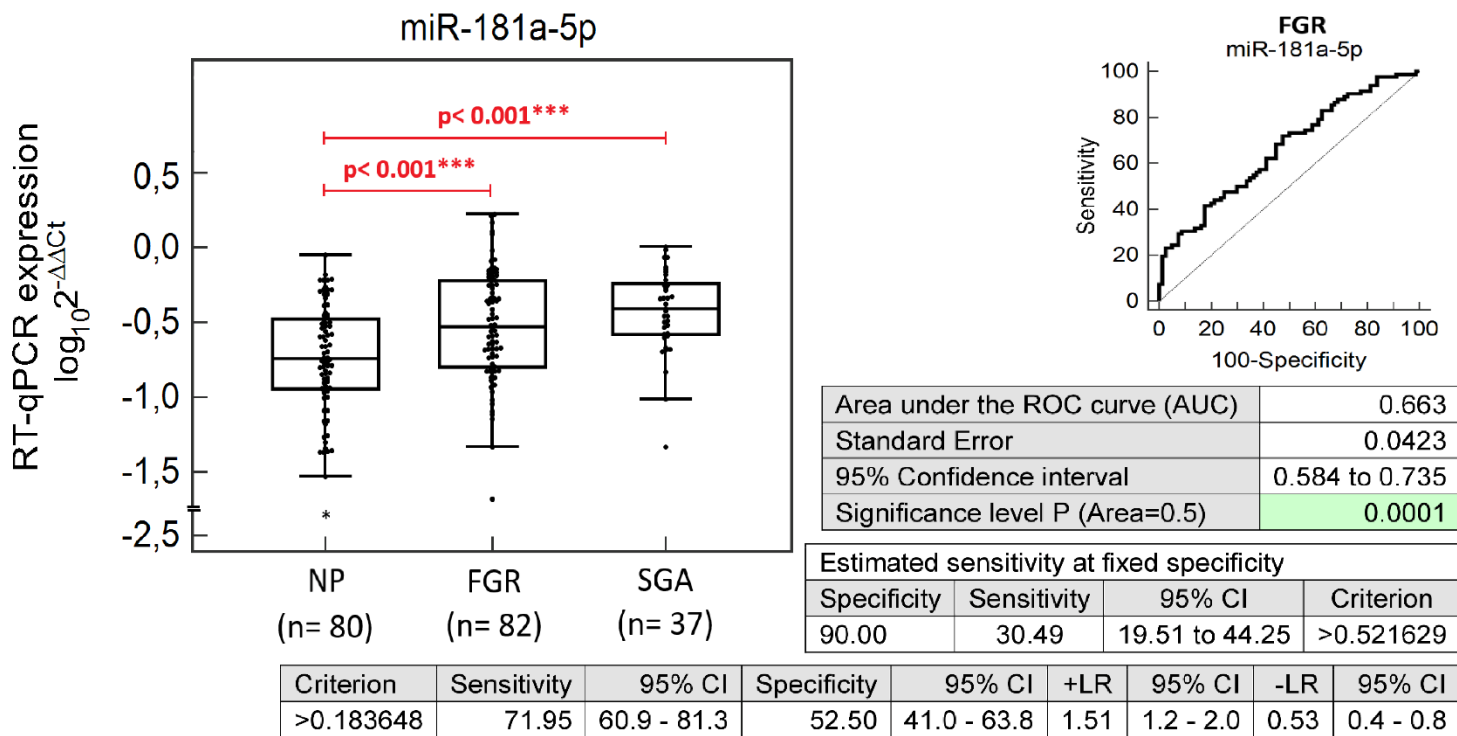

O

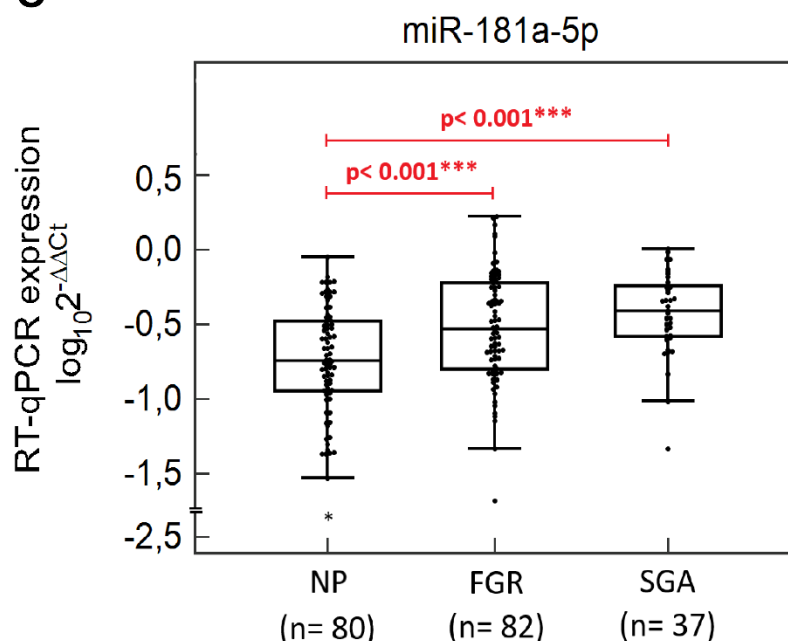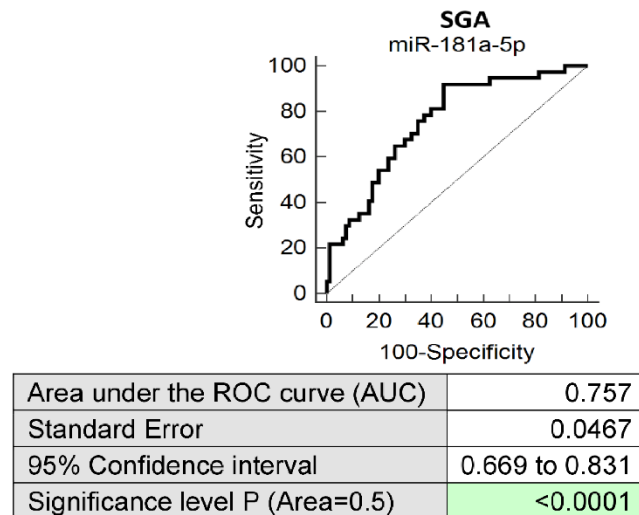

| Estimated sensitivity at fixed specificity |             |                |  |           |  |  |  |  |
|--------------------------------------------|-------------|----------------|--|-----------|--|--|--|--|
| Specificity                                | Sensitivity | 95% CI         |  | Criterion |  |  |  |  |
| 90.00                                      | 32.43       | 16.22 to 56.76 |  | >0.521629 |  |  |  |  |

| Criterion | Sensitivity | 95% CI      |  | Specificity | 95% CI      |  | +LR  | 95% CI     |  |
|-----------|-------------|-------------|--|-------------|-------------|--|------|------------|--|
| >0.201448 | 91.89       | 78.1 - 98.3 |  | 55.00       | 43.5 - 66.2 |  | 2.04 | 1.6 - 2.6  |  |
|           |             |             |  |             |             |  |      | 0.15       |  |
|           |             |             |  |             |             |  |      | 0.05 - 0.4 |  |

P

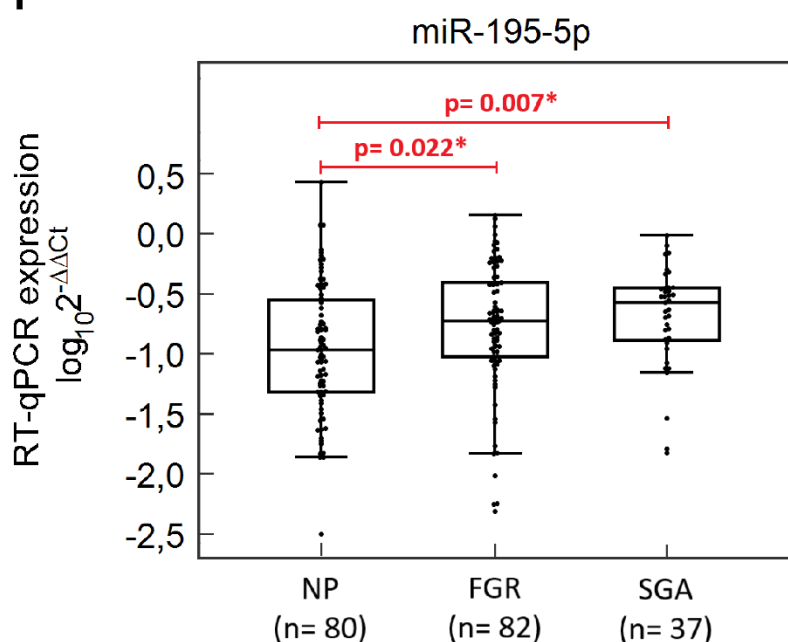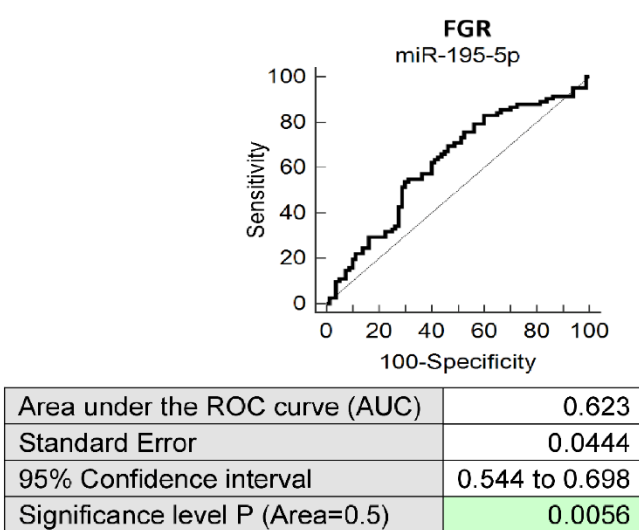

| Estimated sensitivity at fixed specificity |             |               |  |           |  |  |  |  |
|--------------------------------------------|-------------|---------------|--|-----------|--|--|--|--|
| Specificity                                | Sensitivity | 95% CI        |  | Criterion |  |  |  |  |
| 90.00                                      | 19.51       | 7.32 to 32.93 |  | >0.553901 |  |  |  |  |

| Criterion | Sensitivity | 95% CI      |  | Specificity | 95% CI      |  | +LR  | 95% CI    |  |
|-----------|-------------|-------------|--|-------------|-------------|--|------|-----------|--|
| >0.176527 | 53.66       | 42.3 - 64.7 |  | 70.00       | 58.7 - 79.7 |  | 1.79 | 1.2 - 2.6 |  |
|           |             |             |  |             |             |  |      | 0.66      |  |
|           |             |             |  |             |             |  |      | 0.5 - 0.9 |  |

**Q**

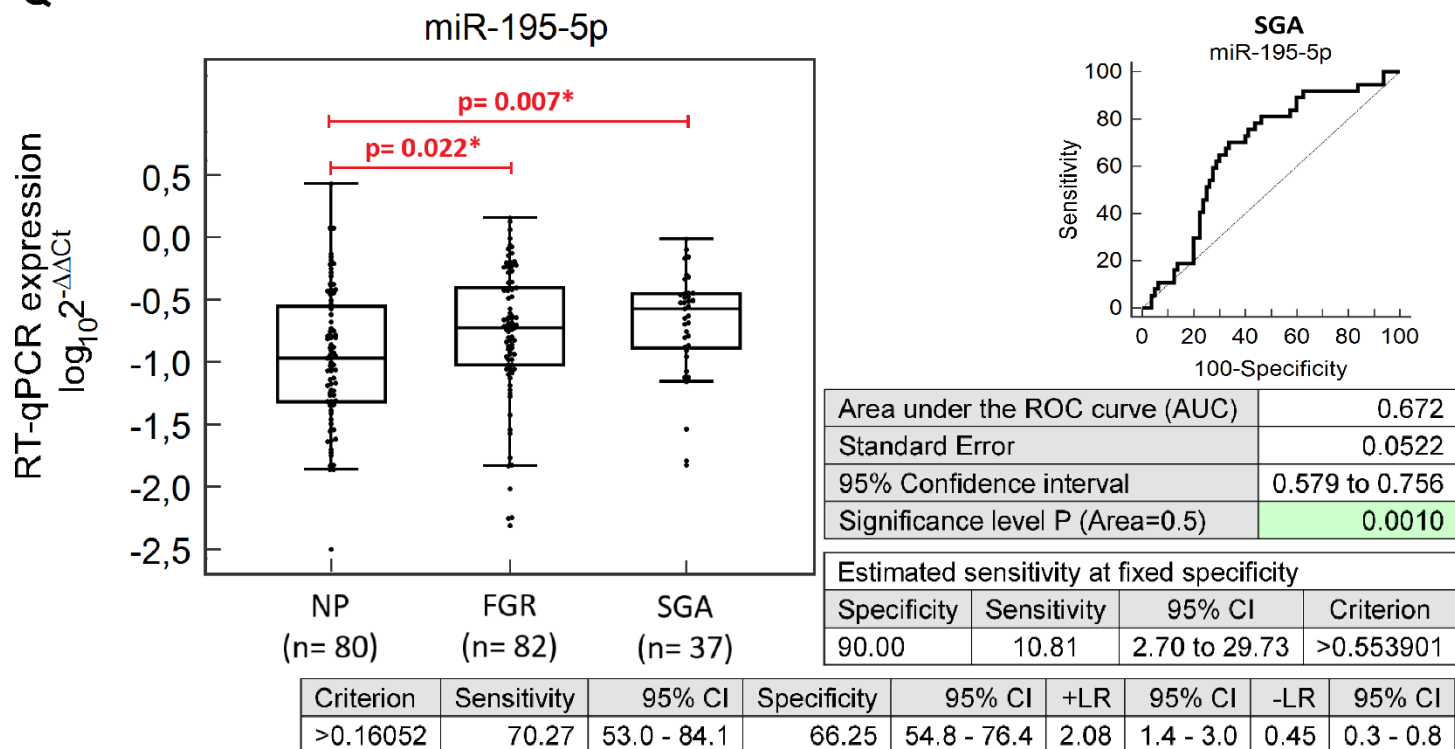

**R**

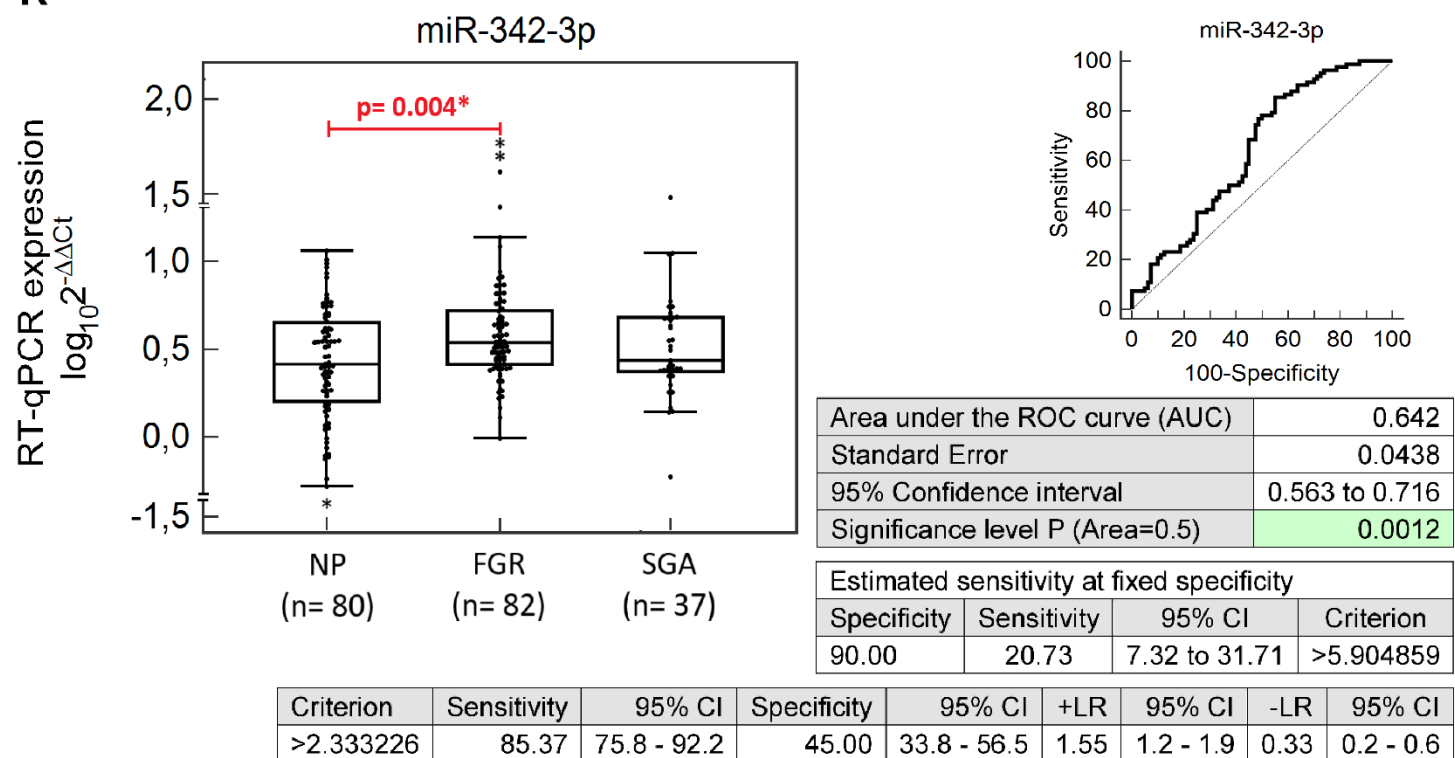

S

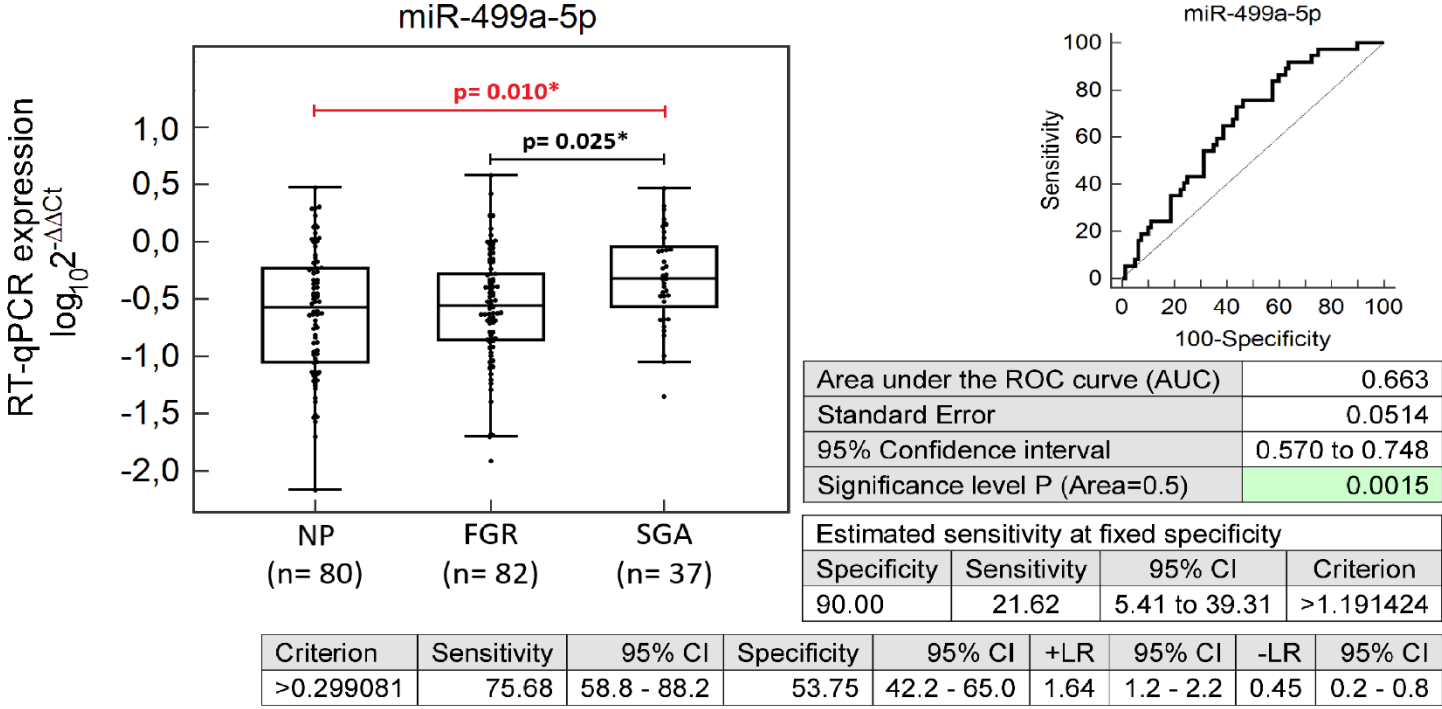

T

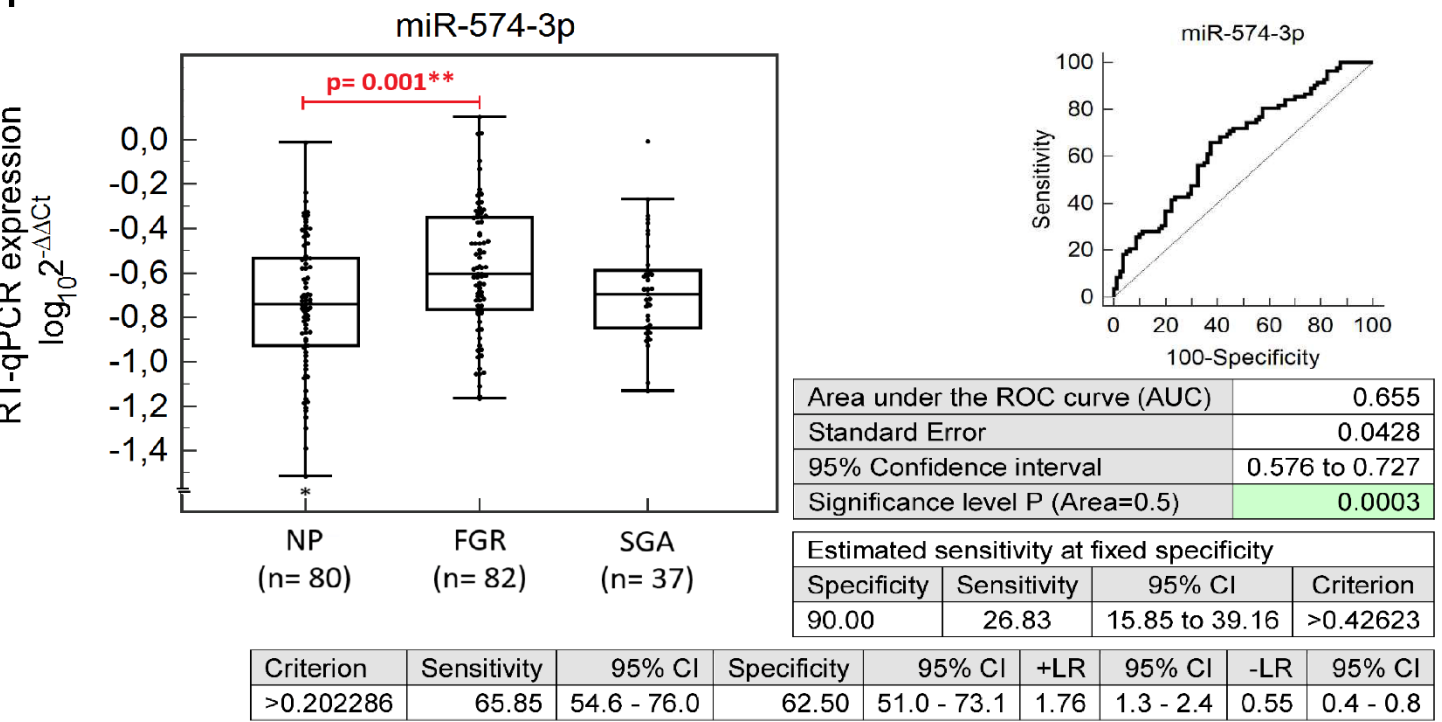

**Figure S1:** Gene expression of cardiovascular disease-associated microRNAs in peripheral blood leukocytes in early stages of gestation—comparison between appropriate-for-gestational-age (AGA) fetuses, small-for-gestational-age (SGA) fetuses, and fetal growth-restricted (FGR) fetuses; statistical significant data after Benjamini–Hochberg correction (results after the Benjamini-Hochberg correction are marked by \* for  $\alpha=0.05$ , \*\* for  $\alpha=0.01$ , and \*\*\* for  $\alpha=0.001$ ).

NP, normal pregnancies (appropriate-for-gestational-age fetuses); FGR, fetal growth restricted fetuses; SGA, small-for-gestational-age fetuses
