# Supplementary material for: First-Trimester Screening for Fetal Growth Restriction and Small-for-Gestational-Age Pregnancies without Preeclampsia Using Cardiovascular Disease-Associated MicroRNA Biomarkers
Source: MDPI journal article supplement (doi:10.3390/biomedicines10030718), 2022-03-19
Supplement: s1 [file s1]

Supplementary Figure S2.

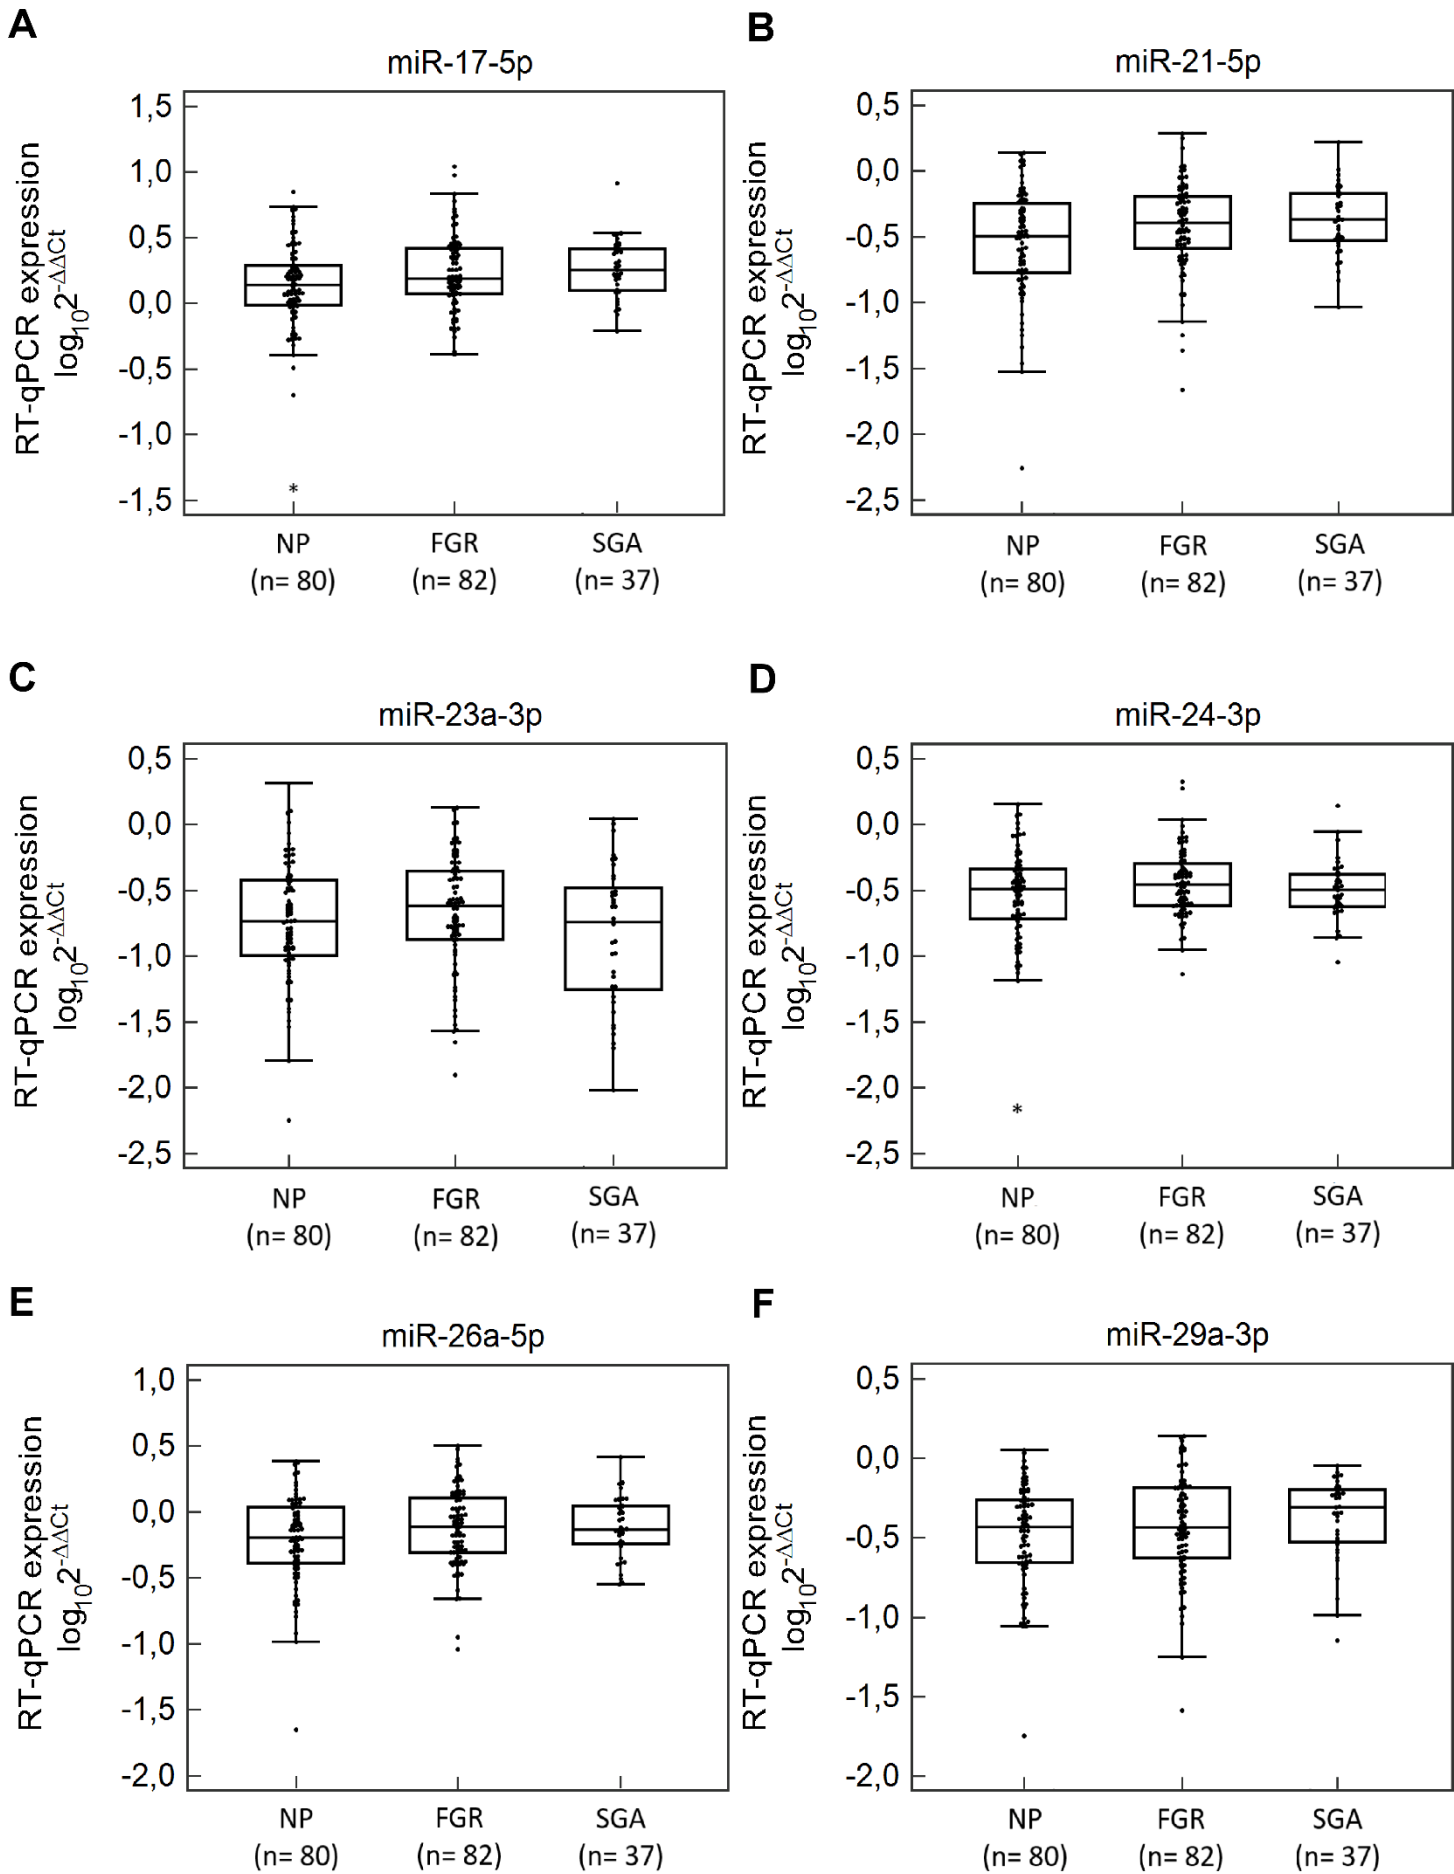

**G**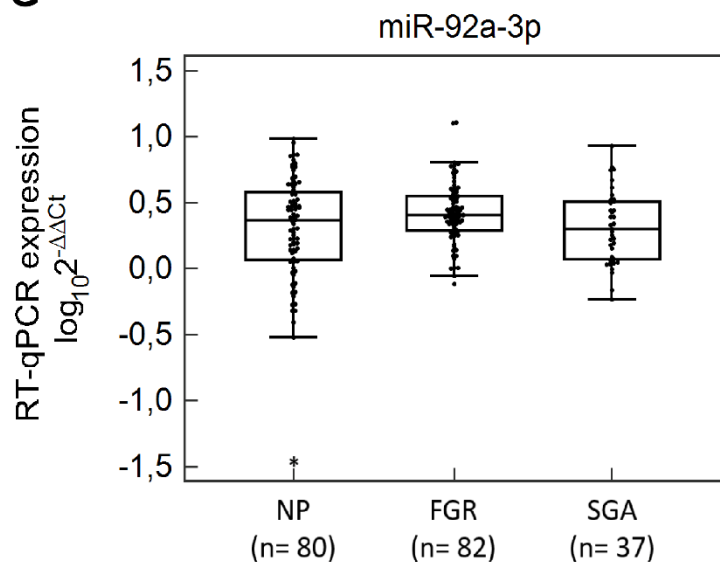**H**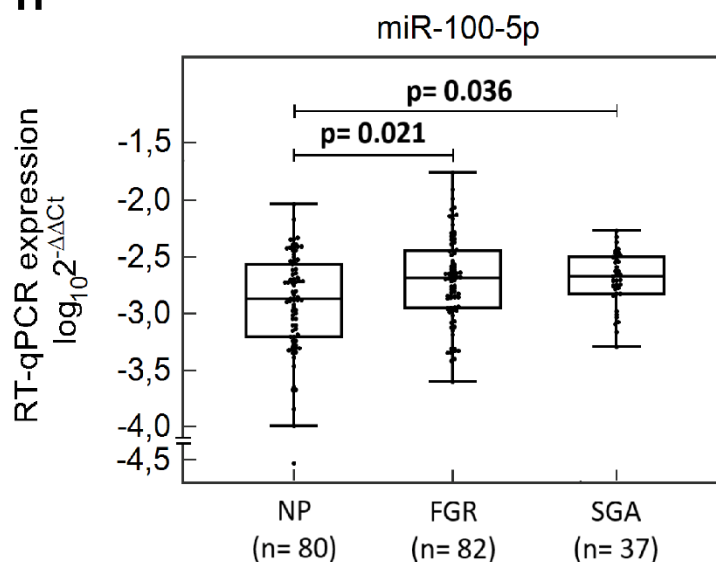**I**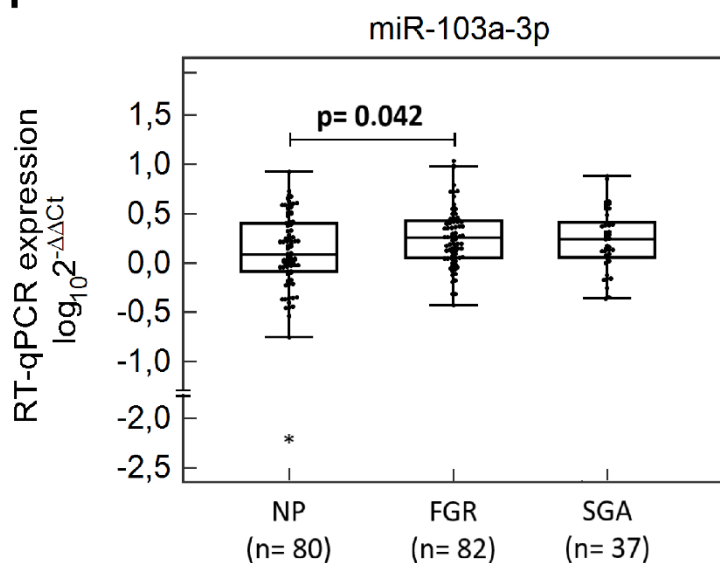**J**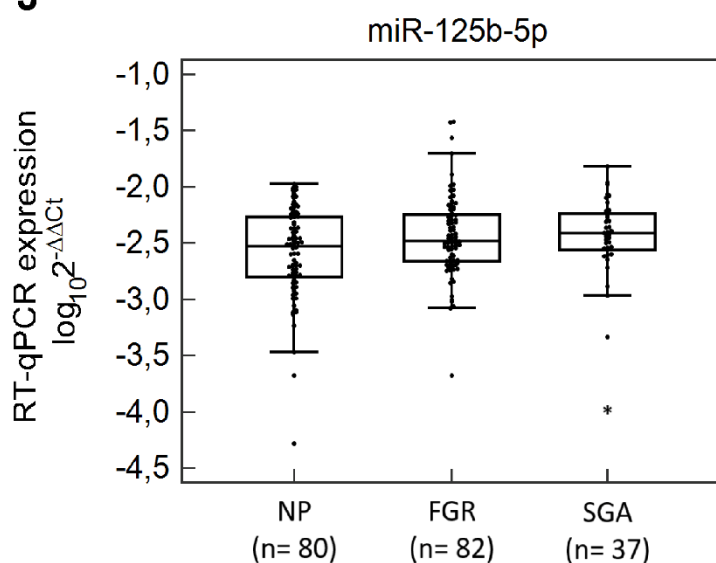**K**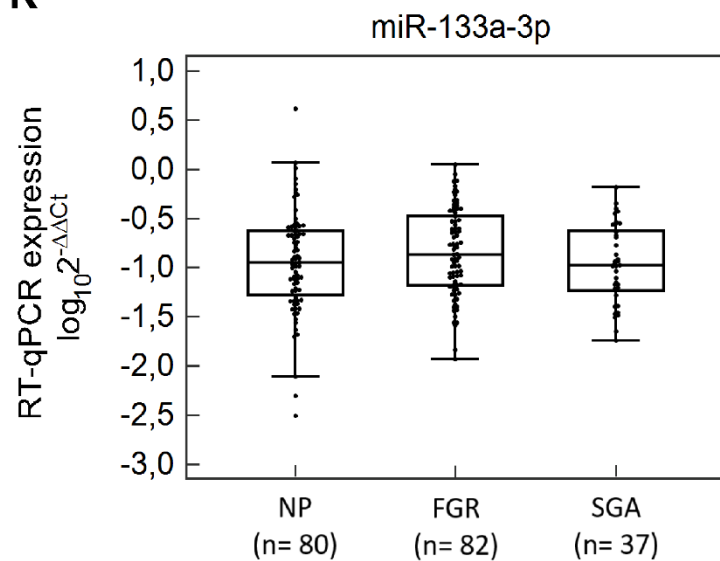**L**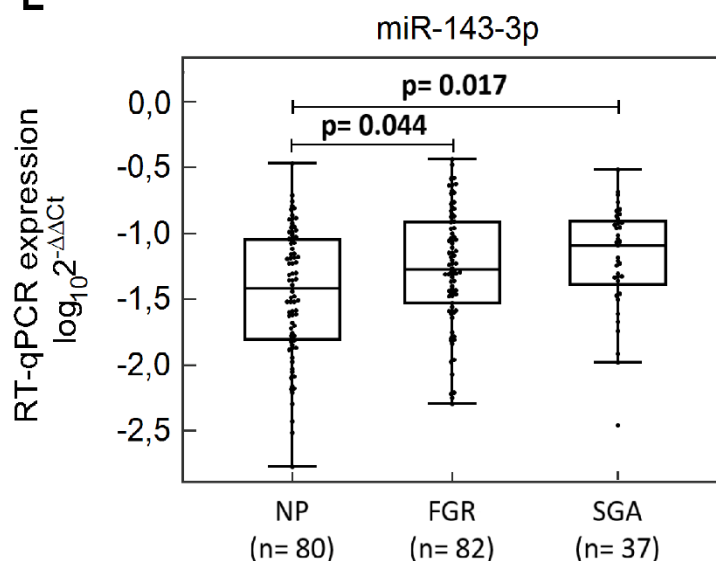

**M**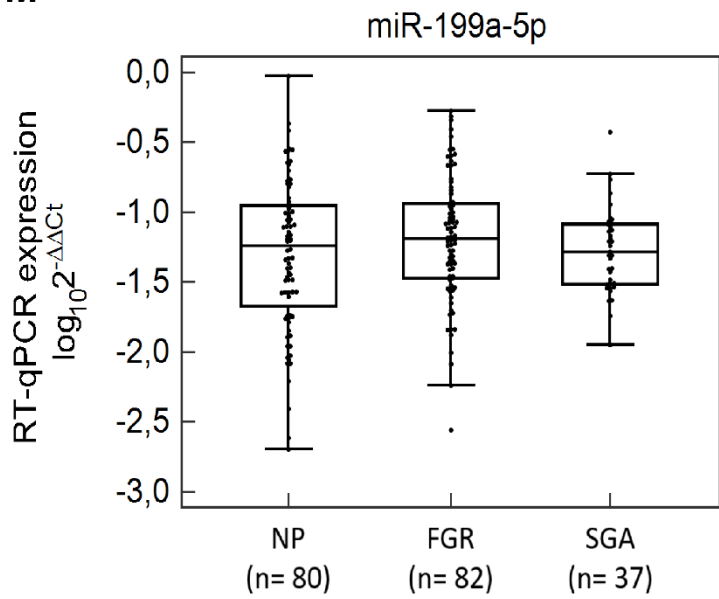**N**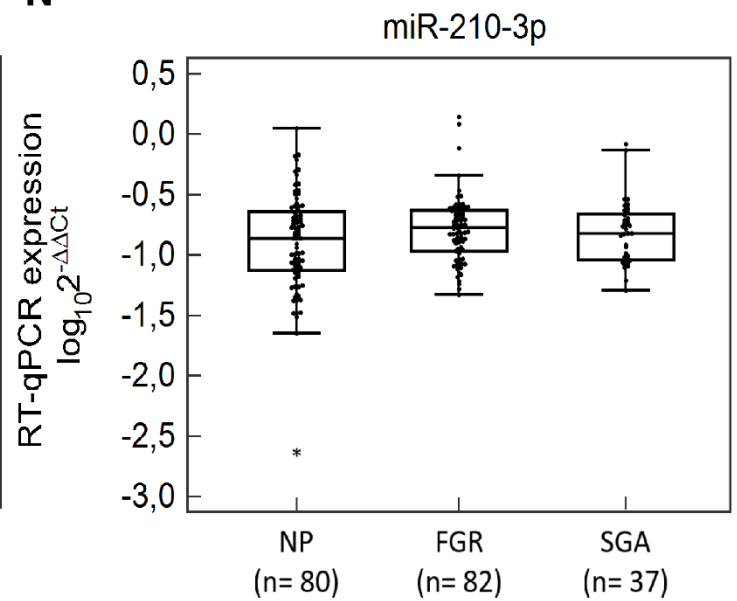**O**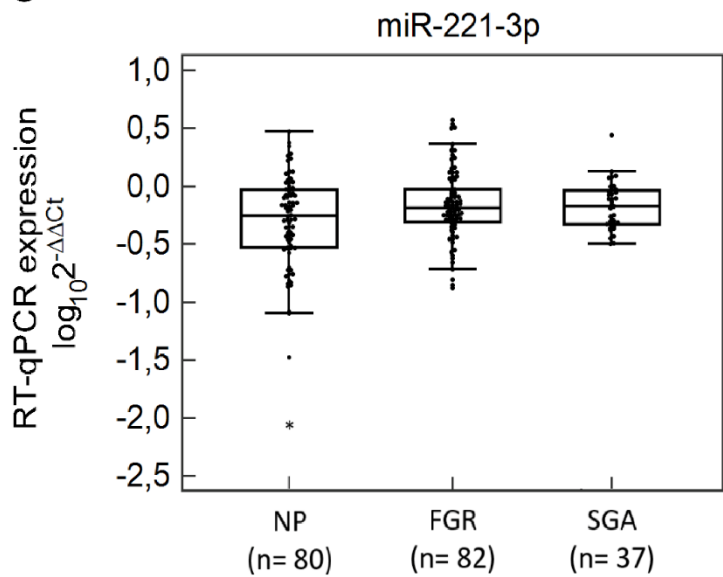

**Figure S2:** Gene expression of cardiovascular disease-associated microRNAs in peripheral blood leukocytes in early stages of gestation—comparison between appropriate-for-gestational-age (AGA) fetuses, small-for-gestational-age (SGA) fetuses, and fetal growth-restricted (FGR) fetuses—statistical non-significant data after Benjamini–Hochberg correction. NP, normal pregnancies (appropriate-for-gestational-age fetuses); FGR, fetal growth restricted fetuses; SGA, small-for-gestational-age fetuses
